# Supplementary material
Source: publisher figshare collection journal article supplement (https://rs.figshare.com/ndownloader/files/8654230)
Supplement: Supplementary file 1 [file 8654230]

**MODELS:**

***2-parameter with lognormal heteroscedastic error**

**proc** **model** data=mydata method=Marquardt PRL=both;

parms a=**1** b=**1**;

Y = a * X**b*exp(c*X2);

resid.Y = log10 (actual.Y/pred.Y);

fit Y/ FIML normal white breusch=(**1** X) out = output1 outpredict outresid;

**run**;

***2-parameter normal homoscedastic**

**proc** **model** data=mydata method=Marquardt PRL=both;

parms a=**1** b=**1**;

Y = a * X**b*exp(c*X2);

h.Y = sigma****2**;

fit Y/ FIML normal white breusch=(**1** X) out = output2 outpredict outresid;

**run**;

***2-parameter normal heteroscedastic**

**proc** **model** data=mydata method=Marquardt PRL=both;

parms a=**1** b=**1**;

Y = a * X**b*exp(c*X2);

h.Y = sigma****2** * (X**(**2***alpha));

fit Y / FIML normal white breusch=(**1** X) out = output3 outpredict outresid;

**run**;

***3-parameter log-normal heteroscedastic**

**proc model** data=mydata method=Marquardt PRL=both;

parms a=**1** b=**1**;

Y = a * X**b*exp(c*X2) + d;

resid.Y = log10 (actual.Y/pred.Y);

fit Y/ FIML normal white breusch=(**1** X) out = output4 outpredict outresid;

**run**;

***3-parameter normal homoscedastic**

**proc** **model** data=mydata method=Marquardt PRL=both;

parms a=**1** b=**1**;

Y = a * X**b*exp(c*X2) + d;

h.Y = sigma****2**;

fit Y/ FIML normal white breusch=(**1** X) out = output5 outpredict outresid;

**run**;

***3-parameter normal heteroscedastic**

**proc** **model** data=mydata method=Marquardt PRL=both;

parms a=**1** b=**1**;

Y = a * X**b*exp(c*X2) + d;

h.Y = sigma****2** * (X**(**2***alpha));

fit Y/ FIML normal white breusch=(**1** X) out = output6 outpredict outresid;

**run**;

***simple linear regression with normal homoscedastic error**

**proc** **model** data=mydata method=Marquardt PRL=both;

Y = a + b*X + c*X2;

h.Y = sigma****2**;

fit Y/ FIML normal white breusch=(**1** X) out = output7 outpredict outresid;

**run**;

***simple linear regression with normal heteroscedastic error**

**proc** **model** data=mydata method=Marquardt PRL=both;

Y = a + b*X+c*X2;

h.Y = sigma****2** * (X**(**2***alpha));

fit Y/ FIML normal white breusch=(**1** X) out = output8 outpredict outresid;

**run**;

***simple linear regression with lognormal heteroscedastic error**

**proc** **model** data=mydata method=Marquardt PRL=both;

Y = a + b*X+c*X2;

resid.Y = log10 (actual.Y/pred.Y);

fit Y/ FIML normal white breusch=(**1** X) out = output9 outpredict outresid;

**run**;

***straight line no intercept with normal homoscedastic error**

**proc** **model** data=mydata method=Marquardt PRL=both;

Y = b*X + c*X2;

h.Y = sigma****2**;

fit Y/ FIML normal white breusch=(**1** X) out = output10 outpredict outresid;

**run**;

***straight line no intercept with normal heteroscedastic error**

**proc** **model** data=mydata method=Marquardt PRL=both;

Y = b*X+c*X2;

h.Y = sigma****2** * (X**(**2***alpha));

fit Y/ FIML normal white breusch=(**1** X) out = output11 outpredict outresid;

**run**;

***straight line no intercept with lognormal heteroscedastic error**

**proc** **model** data=mydata method=Marquardt PRL=both;

Y = b*X+c*X2;

resid.Y = log10 (actual.Y/pred.Y);

fit Y/ FIML normal white breusch=(**1** X) out = output12 outpredict outresid;

**run**;
